# Supplementary material
Source: MDPI journal article supplement (https://www.mdpi.com/2071-1050/11/16/4387)
Supplement: s1 [file s1]

## Sheet: Table A1
tij	0	1	2	3	4	5	6	7	8	9	10
0	0	0.19	0.24	0.29	0.34	0.4	0.63	0.59	0.5	0.46	0.43
1	0.2	0	0.12	0.38	0.51	0.49	0.6	0.59	0.59	0.5	0.53
2	0.3	0.14	0	0.25	0.4	0.33	0.53	0.49	0.52	0.46	0.51
3	0.33	0.43	0.24	0	0.23	0.11	0.45	0.39	0.3	0.25	0.31
4	0.4	0.55	0.4	0.23	0	0.33	0.68	0.54	0.37	0.23	0.18
5	0.45	0.52	0.3	0.1	0.3	0	0.4	0.34	0.24	0.17	0.33
6	0.65	0.57	0.42	0.38	0.6	0.36	0	0.12	0.28	0.42	0.55
7	0.6	0.57	0.4	0.33	0.47	0.31	0.13	0	0.17	0.31	0.45
8	0.58	0.62	0.48	0.29	0.36	0.24	0.33	0.2	0	0.17	0.37
9	0.55	0.57	0.44	0.25	0.26	0.18	0.48	0.37	0.17	0	0.16
10	0.5	0.62	0.5	0.31	0.19	0.36	0.68	0.54	0.35	0.19	0

## Sheet: Table A2
dij	0	1	2	3	4	5	6	7	8	9	10
0	0	8	12	13	16	18	25	24	23	22	20
1	8	0	6	18	23	22	24	24	26	24	26
2	12	6	0	12	20	15	21	20	24	22	25
3	13	18	12	0	11	5	18	16	14	12	15
4	16	23	20	11	0	14	28	22	17	12	9
5	18	22	15	5	14	0	16	14	11	8	16
6	26	24	21	18	28	16	0	5	13	19	27
7	24	24	20	16	22	14	5	0	8	15	22
8	23	26	24	14	17	11	13	8	0	8	17
9	22	24	22	12	12	8	19	15	8	0	9
10	20	26	25	15	9	16	27	22	16	9	0
